# Supplementary material for: Prevalence and risk factors of Severe Acute Respiratory Syndrome Coronavirus 2 infection in women and children in peri-urban communities in Pakistan: A prospective cohort study
Source: PubMed Central journal article supplement (PMC9757617; doi:10.7189/jogh.12.95955), 2022-12-17
Supplement: jogh-12-05055-s001.pdf [file jogh-12-05055-s001.pdf]

**Prevalence and risk factors of Severe Acute Respiratory Syndrome Coronavirus 2 infection in women and children in peri-urban communities in Pakistan: a prospective cohort study**

**Supplementary information**

**Authors**

Nadia Ansari MSc<sup>1\*</sup>, M. Imran Nisar <sup>1\*</sup>, Farah Khalid MSc<sup>1\*</sup>, Usma Mehmood MSc<sup>1</sup>, Asra Abeer Usmani MBBS<sup>1</sup>, Fariha Shaheen MSc<sup>1\*</sup>, Aneeta Hotwani MPhil<sup>1</sup>, Kehkashan Begum MPhil<sup>1</sup>, Amina Barkatali MA<sup>1</sup>, Sachiyo Yoshida PhD<sup>2</sup>, Alexander A Manu<sup>3</sup>, Sunil Sajawal PhD<sup>4,5</sup>, Abdullah H Baqui PhD<sup>6</sup>, Rajiv Bahl PhD<sup>2</sup>, Fyezah Jehan MSc<sup>1\*\*</sup>

**Author Affiliations**

1 Department of Pediatrics and Child Health, The Aga Khan University, Karachi

2 Department for Maternal, Child, Adolescents and Ageing Health, World Health Organization, Geneva, Switzerland

3 Department of Epidemiology and Disease Control, University of Ghana School of Public Health, Legon, Accra, Ghana

4 Center for Public Health Kinetics, Global Division, LGL Vinoba Puri, Lajpat Nagar II, New Delhi, India

5 Public Health Laboratory-IDC, Chake Chake, Pemba, Tanzania

6 Department of International Health, Johns Hopkins Bloomberg School of Public Health, Baltimore, Maryland, USA

\*Joint first author

\*\* Corresponding author

**Table s1: Comparison of participants consented and refused for blood sample collection**

|                                                                       | <b>Consented</b> | <b>Refused</b> | <b>Total</b> | <b>P-value</b> |
|-----------------------------------------------------------------------|------------------|----------------|--------------|----------------|
|                                                                       | 1414             | 485            |              |                |
| <b>Demographic Factors</b>                                            |                  |                |              |                |
| <b>Number of household members</b>                                    |                  |                |              |                |
| ≤3                                                                    | 170 (12.0)       | 51 (10.5)      | 221 (11.6)   | 0.2            |
| 4-6                                                                   | 828 (58.6)       | 270 (55.7)     | 1098 (57.8)  |                |
| ≥ 7                                                                   | 416 (27.2)       | 164 (33.8)     | 580 (30.5)   |                |
| <b>Wealth tertiles, n (%)</b>                                         |                  |                |              |                |
| 1st wealth tertile                                                    | 466 (33.0)       | 167 (64.5)     | 633 (33.3)   | 0.6            |
| 2nd wealth tertile                                                    | 468 (33.1)       | 165 (34.0)     | 633 (33.3)   |                |
| 3rd wealth tertile                                                    | 480 (34.0)       | 153 (31.6)     | 633 (33.3)   |                |
| <b>Type of toilet facility, n (%)</b>                                 |                  |                |              |                |
| Improved toilet facility <sup>1</sup>                                 | 1183 (83.7)      | 402 (82.9)     | 1585 (83.5)  | 0.7            |
| Unimproved toilet facility <sup>2</sup>                               | 231 (16.3)       | 83 (17.1)      | 314 (16.5)   |                |
| <b>Drinking water, n (%)</b>                                          |                  |                |              |                |
| Improved <sup>3</sup>                                                 | 1121 (79.3)      | 397 (81.9)     | 1518 (79.9)  | 0.2            |
| Un-improved <sup>4</sup>                                              | 293 (20.7)       | 88 (18.1)      | 381 (20.1)   |                |
| <b>Household Hunger*, n (%)</b>                                       | n= 1472          | n = 33         | n = 1505     |                |
| No or mild hunger                                                     | 1153 (78.3)      | 23 (69.7)      | 1176 (78.1)  | 0.2            |
| Moderate to severe hunger                                             | 319 (21.7)       | 10 (30.3)      | 329 (21.9)   |                |
| <b>Total Coping Strategy Index (CSI) Score</b>                        | n= 1172          | n= 327         | n= 1499      |                |
| Mean ± SD                                                             | 1.8 ± 4.8        | 1.8 ± 4.5      | 1.8 ± 4.8    | 0.1            |
| <b>Woman related factors (Maternal and household characteristics)</b> |                  |                |              |                |
| <b>Woman Age categories, n (%)</b>                                    |                  |                |              |                |
| 20-29 years                                                           | 505 (35.7)       | 252 (52.0)     | 757 (39.9)   | <0.001         |
| 30-39 years                                                           | 787 (55.7)       | 203 (41.9)     | 990 (52.1)   |                |
| ≥ 40 years                                                            | 122 (8.6)        | 30 (6.2)       | 152 (8.0)    |                |
| <b>Highest grade or level of school completed by woman n (%)</b>      |                  |                |              |                |
| No education                                                          | 735 (52.0)       | 257 (53.0)     | 992 (52.2)   | 0.4            |
| Primary                                                               | 334 (23.6)       | 106 (21.9)     | 440 (23.2)   |                |
| Secondary                                                             | 272 (19.2)       | 88 (18.1)      | 360 (19.0)   |                |
| Post-secondary or higher                                              | 73 (5.2)         | 34 (7.0)       | 107 (5.6)    |                |

|                                                                    |             |            |             |     |
|--------------------------------------------------------------------|-------------|------------|-------------|-----|
| <b>Woman occupation, n (%)</b>                                     |             |            |             |     |
| Housewife                                                          | 1219 (86.2) | 406 (83.7) | 1625 (85.6) | 0.2 |
| Employed                                                           | 195 (13.8)  | 79 (16.3)  | 274 (14.4)  |     |
| <b>Highest grade or level of school completed by husband n (%)</b> |             |            |             |     |
| No education                                                       | 711 (50.2)  | 228 (47.0) | 939 (49.5)  | 0.5 |
| Primary incomplete                                                 | 297 (21.0)  | 109 (22.5) | 406 (21.4)  |     |
| Completed primary                                                  | 406 (28.7)  | 148 (30.5) | 554 (29.2)  |     |
| <b>Husband occupation, n (%)</b>                                   |             |            |             |     |
| Govt/Private service                                               | 410 (29.0)  | 131 (27.0) | 541 (28.5)  | 0.2 |
| Daily wage earner                                                  | 696 (49.2)  | 228 (47.0) | 924 (48.7)  |     |
| Self-employed                                                      | 238 (16.8)  | 92 (19.0)  | 330 (17.4)  |     |
| Other (Other work, does not work, farming)                         | 70 (5.0)    | 34 (7.0)   | 104 (5.5)   |     |
| Total                                                              |             |            |             |     |
| <b>Smoking, n (%)</b>                                              |             |            |             |     |
| No                                                                 | 1354 (95.8) | 472 (97.3) | 1826 (96.2) | 0.1 |
| Yes                                                                | 60 (4.2)    | 13 (2.7)   | 73 (3.8)    |     |
| <b>Use of tobacco, n (%)</b>                                       |             |            |             |     |
| No                                                                 | 1024 (72.4) | 337 (73.9) | 1361 (72.8) | 0.5 |
| Yes                                                                | 390 (27.6)  | 119 (26.1) | 509 (27.2)  |     |

<sup>1</sup> Flush or pour flush toilet, Pit latrine.

<sup>2</sup> Dry toilet pump, Bucket latrine, no toilet facility (uses open space or field, other toilet).

<sup>3</sup> Piped water into the dwelling, public tap, Tube well or borehole or hand pump.

<sup>4</sup> Open well, Closed well, Tanker truck, small cart with tank, Surface water (river/dam/lake/pond/stream/canal), Bottled water, Rainwater, Other water source.

**Table S2 a: Distribution of common symptoms among women during baseline survey**

| <b>Symptoms</b>       | <b>n (%)</b> |
|-----------------------|--------------|
| Headache              | 119(0.99)    |
| Fever                 | 111(0.93)    |
| Body aches            | 77(0.64)     |
| Cough                 | 75(0.63)     |
| Runny/stuffy nose     | 71(0.59)     |
| Sneezing              | 40(0.33)     |
| Fatigue               | 38(0.32)     |
| Muscle aches          | 23(0.19)     |
| Sore throat           | 22(0.18)     |
| Dizziness or fainting | 20(0.17)     |

**Table S2b: Distribution of common symptoms among women during follow-up survey**

| <b>Symptoms</b>          | <b>n (%)</b> |
|--------------------------|--------------|
| Body aches               | 412(1.08)    |
| Headache                 | 332(0.87)    |
| Fever                    | 303(0.8)     |
| Fatigue                  | 261(0.69)    |
| Cough                    | 139(0.37)    |
| Runny/stuffy nose        | 135(0.36)    |
| Dizziness or fainting    | 134(0.35)    |
| Muscle aches             | 116(0.31)    |
| Abdominal cramps or pain | 77(0.2)      |
| Sneezing                 | 62(0.16)     |

**Table S3 a: Distribution of common symptoms among children during baseline survey**

| <b>Symptom</b>    | <b>n (%)</b> |
|-------------------|--------------|
| Runny/stuffy nose | 111(1.22)    |
| Cough             | 87(0.96)     |
| Fever             | 80(0.88)     |
| Sneezing          | 35(0.38)     |
| Diarrhoea         | 18(0.2)      |
| Sore throat       | 13(0.14)     |
| Nausea/ vomiting  | 12(0.13)     |
| Headache          | 9(0.1)       |
| Body aches        | 8(0.09)      |

**Table S3b: Distribution of common symptoms among children during follow-up survey**

| <b>Symptom</b>           | <b>n (%)</b> |
|--------------------------|--------------|
| Fever                    | 208(0.72)    |
| Cough                    | 161(0.56)    |
| Runny/stuffy nose        | 150(0.52)    |
| Diarrhoea                | 57(0.2)      |
| Skin rashes              | 48(0.17)     |
| Sneezing                 | 47(0.16)     |
| Abdominal cramps or pain | 31(0.11)     |
| Body aches               | 30(0.1)      |
| Headache                 | 25(0.09)     |
